# Supplementary material for: Production of WW males lacking the masculine Z chromosome and mining the Macrobrachium rosenbergii genome for sex-chromosomes
Source: PubMed Central journal article supplement (PMC6712010; doi:10.1038/s41598-019-47509-6), 2019-08-27
Supplement: 41598_2019_47509_MOESM1_ESM.pdf [file 41598_2019_47509_MOESM1_ESM.pdf]

# **Production of WW males lacking the masculine Z chromosome and mining the *Macrobrachium rosenbergii* genome for sex-chromosomes**

**Tom Levy<sup>1</sup>, Ohad Rosen<sup>2</sup>, Rivka Manor<sup>1</sup>, Shahar Dotan<sup>2</sup>, Dudu Azulay<sup>2</sup> Anna Abramov<sup>2</sup>,  
Menachem Y. Sklarz<sup>3</sup>, Vered Chalifa-Caspi<sup>3</sup>, Kobi Baruch<sup>4</sup>, Assaf Shechter<sup>2</sup> and Amir Sagi<sup>1,3\*</sup>**

<sup>1</sup>Department of Life Sciences, Ben-Gurion University of the Negev, P.O. Box 653, Beer Sheva 84105, Israel

<sup>2</sup>Enzootic HK, Ltd., Unit 1109, 11/F, Kowloon Centre, 33 Ashley Road, Tsimshatsui, Kowloon, Hong Kong

<sup>3</sup>The National Institute for Biotechnology in the Negev, Ben-Gurion University of the Negev, P.O. Box 653, Beer Sheva 84105, Israel

<sup>4</sup>NRGene Ltd., Ness-Ziona, 7503649, Israel

\*Author to whom correspondence should be addressed:

Email: [sagia@bgu.ac.il](mailto:sagia@bgu.ac.il) (tel: +972-8-6461364, fax: +972-8-6479062)

## Supplemental material

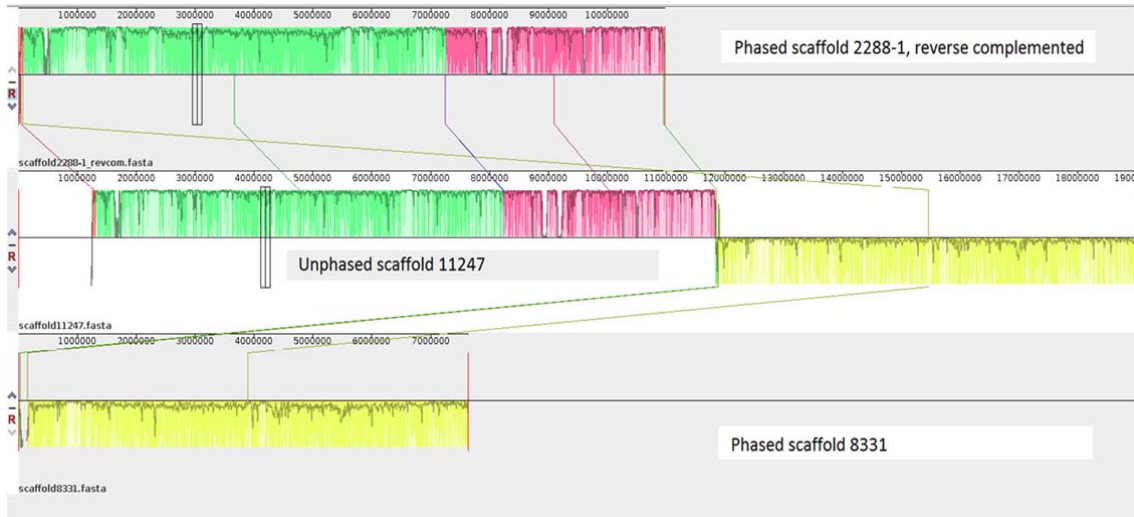

**Figure S1: Representation of an extension process of W/Z-associated scaffold using the phased and unphased genomes.** The process starts with a validated scaffold from the phased genome, identification of another W/Z-associated scaffold candidate via realignment to the unphased genome, and then back to the phased genome. In the following example, a verified W-associated scaffold from the phased genome (scaffold 2288-1) was matched to another scaffold (scaffold 11247) in the unphased genome, which is longer than 2288-1. Then, scaffold 11247 was realigned to the phased genome and its extension matched to another scaffold (scaffold 8331). The result is an extended W-associated scaffold candidate.

**Table S1:** Chromosome size prediction using our estimated haploid genome size (4.08 Gb) and the *M. rosenbergii* karyotype analysis as described by Damrongphol et al. (1991)<sup>53</sup>.

| Chromosome type | Pairs of chromosomes | Reference chromosome for calculation | Relative size per pair* | Calculated haploid size [Gb] |
|-----------------|----------------------|--------------------------------------|-------------------------|------------------------------|
| Very small      | 12                   | 56                                   | <i>X</i>                | 0.045                        |
| Small           | 15                   | 34                                   | <i>1.27X</i>            | 0.057                        |
| Medium          | 26                   | 9                                    | <i>1.68X</i>            | 0.076                        |
| Large           | 6                    | 2                                    | <i>2.52X</i>            | 0.113                        |

\*Haploid size:  $12X + (15 \times 1.27X) + (26 \times 1.68X) + (6 \times 2.52X) = 4.08$  [Gb]

$$89.85X = 4.08 \text{ [Gb]} \quad X = 0.045 \text{ [Gb]}$$

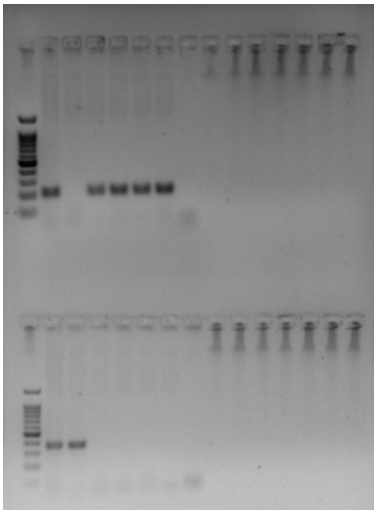

**Figure S2: Genotypic characterization of *M. rosenbergii* WW neo-males (full-length gel from figure 2B).** The gel showing PCR amplification of sex-specific genomic markers (W – top and Z – bottom), shows, from left to right: WZ female, ZZ male and four neo-male individuals (all with the WW genotype): BC, OC and two small males. A 100bp DNA ladder is given.

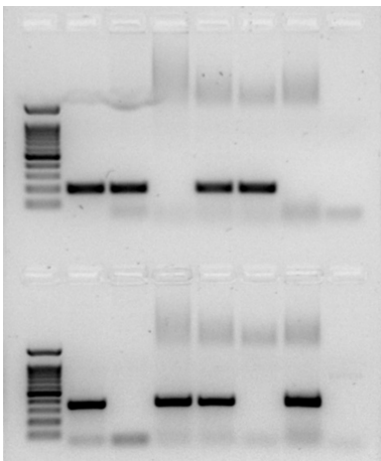

**Figure S3: Proof, using sex specific genomic markers, of the existence of all possible genotype-phenotype combinations in *M. rosenbergii* (full-length gel from figure 3).** The gel showing PCR amplification of sex-specific genomic markers (W – top and Z – bottom) shows, from left to right: WZ female, WW female, ZZ female, WZ male, WW male, and ZZ male. A 100bp DNA ladder is given.
